# Supplementary material for: IND-2, a Quinoline Derivative, Inhibits the Proliferation of Prostate Cancer Cells by Inducing Oxidative Stress, Apoptosis and Inhibiting Topoisomerase II
Source: MDPI journal article supplement (doi:10.3390/life12111879), 2022-11-14

## SUPPLEMENTARY INFORMATION

**Supplementary Figure S1:** The physicochemical properties of IND-2 were evaluated using SwissADME, a free web tool (Daina, et al. 2017) for evaluating pharmacokinetics, drug-likeness, and medicinal chemistry compatibility. The Lipinski rule is not violated by IND-2, which makes it a drug-like molecule. Additionally, it has a favorable bioavailability score of 0.55. This figure was made under the CC-BY 4.0 Creative Commons 4.0 International License.

Figure S1:

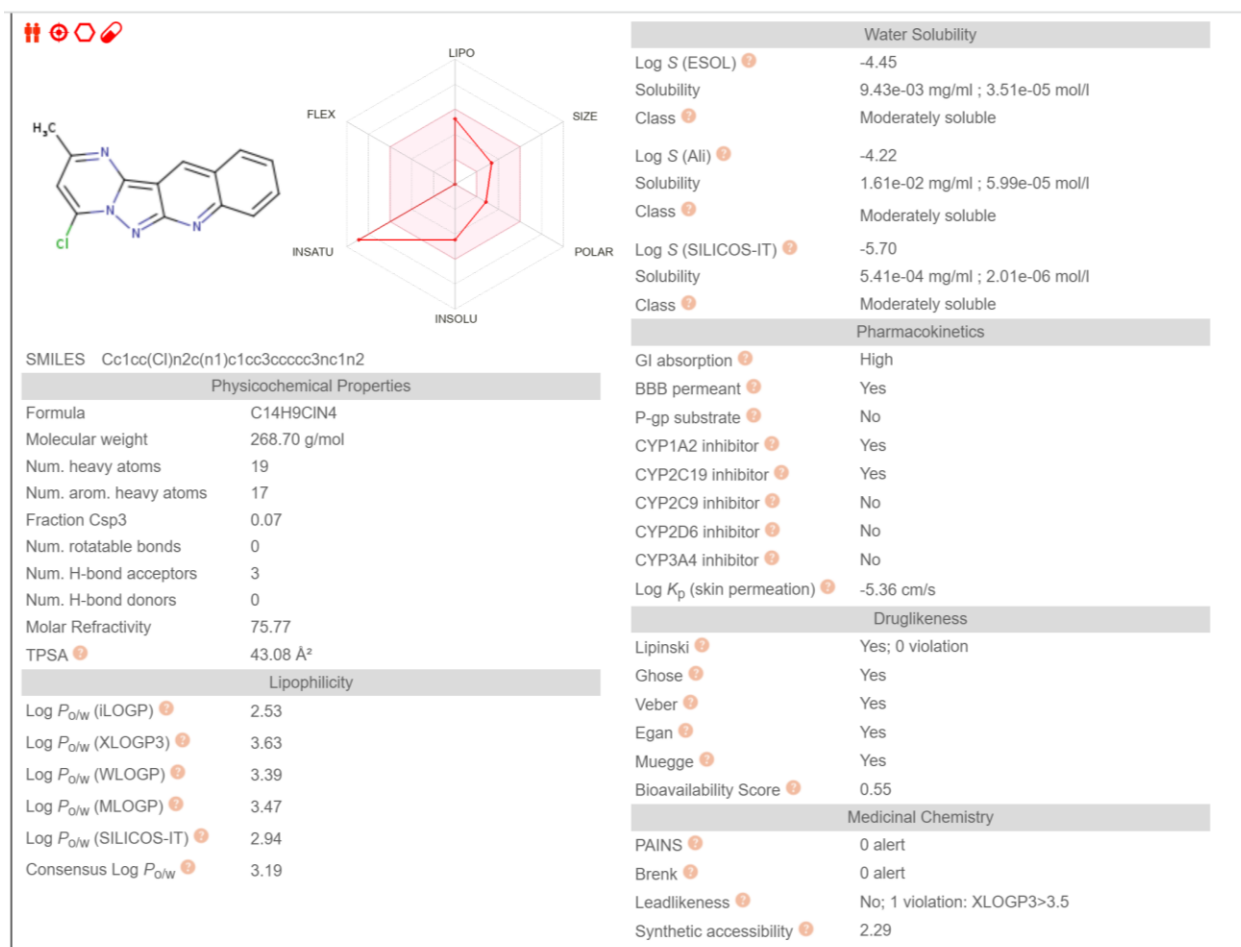

Supplement: s1 [file s1]
